# Supplementary material for: Clarifying the Adsorption of Triphenylamine on Au(111): Filling the HOMO–LUMO Gap
Source: PubMed Central journal article supplement (PMC8802676; doi:10.1021/acs.jpcc.1c08877), 2022-01-17
Supplement: jp1c08877_si_001.pdf [file jp1c08877_si_001.pdf]

## Supporting Information

Clarifying the Adsorption of Triphenylamine on Au(111): Filling the HOMO-LUMO Gap

*Teng Zhang,<sup>1,\*</sup> Pamela H.W. Svensson,<sup>2</sup> Iulia Emilia Brumboiu,<sup>3</sup> Valeria Lanzilotto,<sup>4</sup>  
Cesare Grazioli,<sup>5</sup> Ambra Guarnaccio,<sup>6</sup> Fredrik O.L. Johansson,<sup>2,7,8</sup> Klára Beranová,<sup>9,10</sup>  
Marcello Coreno,<sup>6</sup> Monica de Simone,<sup>5</sup> Luca Floreano,<sup>5</sup> Albano Cossaro,<sup>5,11</sup>  
Barbara Brena,<sup>2,\*</sup> and Carla Puglia<sup>2,\*</sup>*

<sup>1</sup> School of Integrated Circuits and Electronics, MIIT Key Laboratory for Low-Dimensional Quantum Structure and Devices, Beijing Institute of Technology, 100081 Beijing, China;

<sup>2</sup> Department of Physics and Astronomy, Uppsala University, Box 516, SE-751 20 Uppsala, Sweden;

<sup>3</sup> Department of Chemistry, Pohang University of Science and Technology (POSTECH), 37673 Pohang, Republic of Korea;

<sup>4</sup> Sapienza Università di Roma, Department of Chemistry, P.le A. Moro 5, 00185 Roma, Italy;

<sup>5</sup> IOM-CNR, Laboratorio TASC, Sincrotrone Trieste, Basovizza, Trieste, Italy;

<sup>6</sup> ISM-CNR, Istituto di Struttura della Materia, 85050 Tito Scalo (Pz), Italy;

<sup>7</sup> KTH Royal Institute of Technology, Division of Applied Physical Chemistry, Department of Chemistry, 10044 Stockholm, Sweden;

<sup>8</sup> Sorbonne Université, UMR CNRS 7588, Institut des Nanosciences de Paris, F-75005 Paris, France.

<sup>9</sup> Elettra-Sincrotrone Trieste S. C. p. A., Strada Statale 14, km 163.5, Basovizza, 34149 Trieste, Italy;

<sup>10</sup> FZU – Institute of Physics of the Czech Academy of Sciences, 18221 Prague, Czech Republic;

<sup>11</sup> Department of Chemical and Pharmaceutical Sciences, University of Trieste, 34127 Trieste, Italy;

\*Corresponding authors: [teng.zhang@bit.edu.cn](mailto:teng.zhang@bit.edu.cn); [barbara.brena@physics.uu.se](mailto:barbara.brena@physics.uu.se); [carla.puglia@physics.uu.se](mailto:carla.puglia@physics.uu.se)

## N K-edge NEXAFS for different coverages of TPA/Au(111)

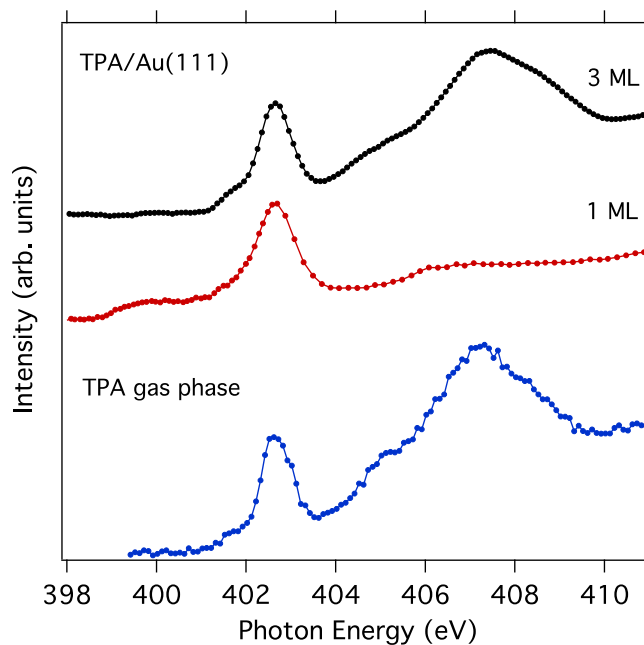

**Figure S1** N K-edge NEXAFS spectra of TPA in gas-phase, of one monolayer (1 ML) and three layers (3 ML) of TPA adsorbed on Au(111). The pre-edge feature is clearly visible in the 1 ML spectrum but disappears in the 3 ML spectrum, indicating that it is the result of the interaction between the molecules and the surface.

## C 1s and N 1s Photoelectron Spectroscopy

In Figure S2(a), we can observe a main peak at a BE of 283.82 eV and a weaker peak at the higher BE of 285.02 eV. In our previous study of gas-phase TPA,<sup>1</sup> we could attribute the lower intensity peak, that in gas-phase was located at 290.94 eV BE, to the C-*ipso*, while the main peak at the lower BE of 289.85 eV, to all the other C atoms (C-*ortho*, C-*meta* and C-*para* atoms). The adsorbed TPA spectrum profile is very similar to the gas-phase one. The general broadening of the adsorbate spectrum represents the main difference due to solid state effects,<sup>2-3</sup> therefore we maintain here the same assignment. The red and black arrows in the Figure S2(a) point to the shake-up features of TPA in gas-phase and /Au(111), respectively.

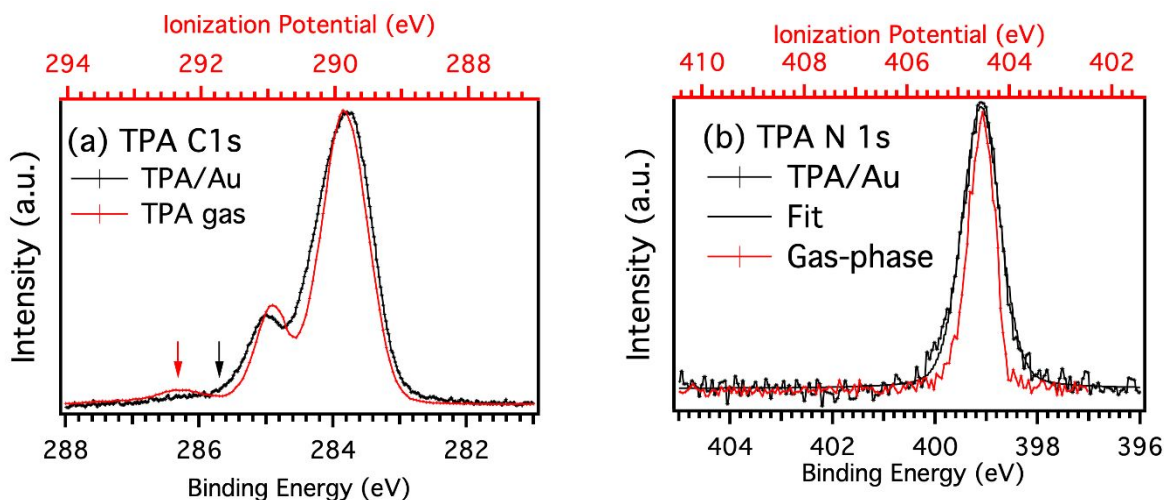

**Figure S2:** The (a) C 1s and (b) N 1s photoemission spectra showing comparison between gas-phase and 1 ML TPA/Au(111). Red and black arrows in (a) point to the shake-up in gas-phase and the C 1s tail in TPA/Au(111).

In Figure S2(b) we present the N 1s PE spectrum of 1 ML TPA/Au(111) in comparison to our previous gas-phase result.<sup>1</sup> The spectrum can be fitted by only one spectral component found at 399.11 eV. As for the C 1s PE spectrum and for similar reasons, the N 1s shows a broadening compared to the gas-phase results (FWHM 0.88 vs 0.56 eV) and a small asymmetry on the higher binding energy side of the peak.

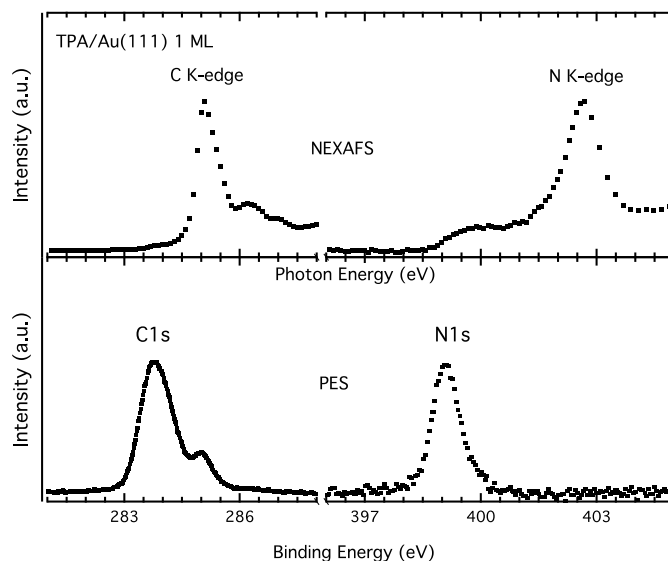

**Figure S3:** C1s and N1s core lines in (top) photoabsorption and (bottom) photoemission for 1 ML TPA/Au(111).

### **Adsorption Energy of TPA/Au(111)**

The adsorption energy was computed as the difference between the total energy of the adsorbed system (TPA+surface) and the sum of the total energies of the molecule and of the surface and results in -2.00 eV. Since we do not have an experimental reference and, moreover, the calculated adsorption energy strongly depends on the choice of the DFT functionals and of the van der Waals descriptions,<sup>4</sup> this result is not a reliable parameter to evaluate the strength of the bonding of the molecule on the surface.

The propeller-like conformation of the TPA does not allow to simply evaluate the binding energy per each C atom. As the molecule has a non-flat geometry, there are six C atoms which are near the Au surface, with distances around 3.1 Å from their closest Au atoms. This would give a maximum value of 330 meV per each of these atoms, which would be rather high. However, this excludes all the other C atoms that are in the molecule, so in principle the binding energy for the C atoms closer to the surface could be lower.

## Individual C contributions to C1s NEXAFS

Figure S4 shows the individual contributions in-plane and out-of-plane to the C K-edge NEXAFS in the HOL2 configuration of each C atom separately:  $C_{ipso}$ ,  $C_{ortho}$ ,  $C_{meta}$  (where *far* and *close* indicate the  $C_{ortho}$  or  $C_{meta}$  atoms closer or farther from the Au surface) and  $C_{para}$ .

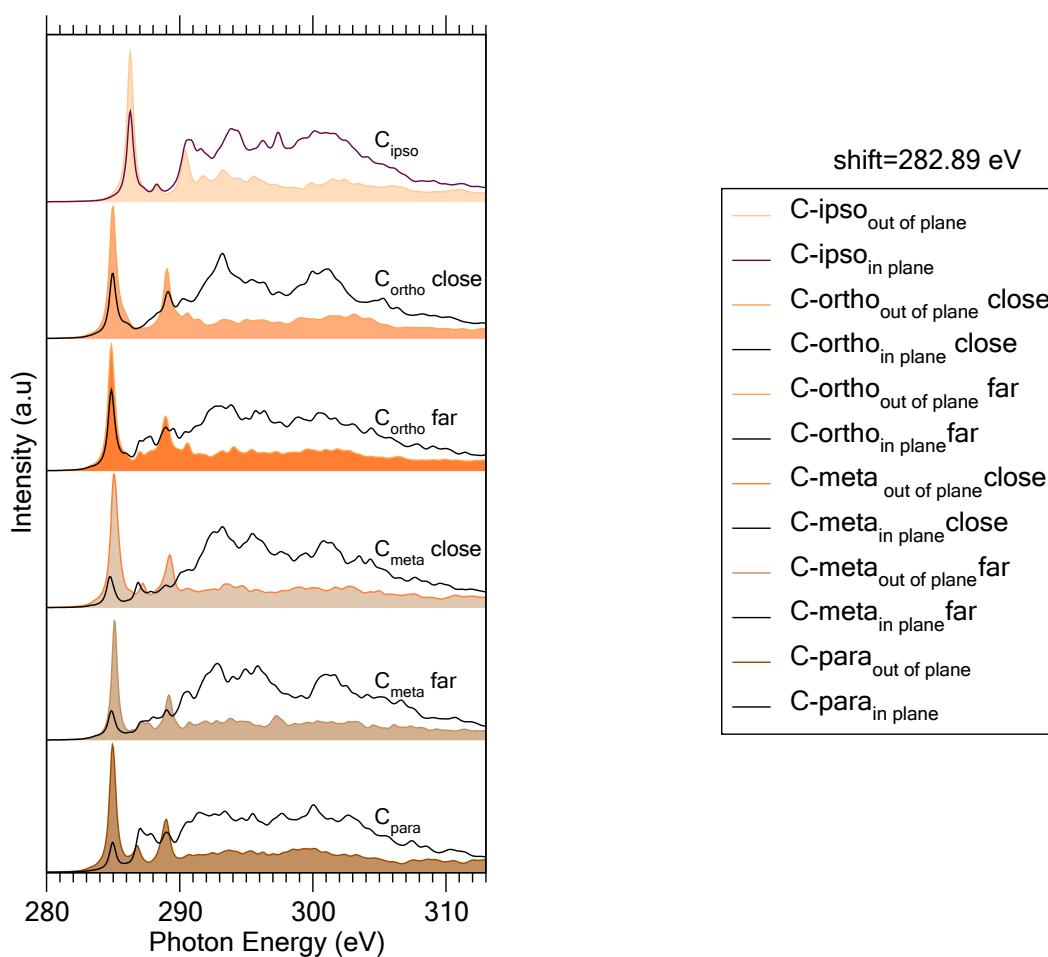

**Figure S4:** Individual contributions to the C K edge NEXAFS in the HOL2 configuration of each C atom separately.

## References

1. Zhang, T., et al., Lone-Pair Delocalization Effects within Electron Donor Molecules: The Case of Triphenylamine and Its Thiophene-Analog. *J Phys Chem C* **2018**, *122*, 17706-17717.
2. Bidermane, I., et al., Characterization of Gas Phase Iron Phthalocyanine with X-Ray Photoelectron and Absorption Spectroscopies. *physica status solidi (b)* **2015**, *252*, 1259-1265.
3. Tillborg, H.; Nilsson, A.; Mrtensson, N., Shake-up and Shake-Off Structures in Core Level Photoemission Spectra from Adsorbates. *Journal of Electron Spectroscopy and Related Phenomena* **1993**, *62*, 73-93.
4. Lüder, J.; Sanyal, B.; Eriksson, O.; Puglia, C.; Brena, B., Comparison of Van Der Waals Corrected and Sparse-Matter Density Functionals for the Metal-Free Phthalocyanine/Gold Interface. *Physical Review B* **2014**, *89*, 045416-045416.
